# Supplementary material
Source: Springer Nature journal article supplement (https://www.springermedizin.de/resource/supplementary/12891_2014_2378_MOESM2_ESM.pdf/9510074)
Supplement: MOESM2 [file 9510074]

Additional file 2

Form for validation of Rheumatoid Arthritis diagnosis in the Swedish national patient register and the Swedish Rheumatology Quality register(SRQ)

**Incident patients:** diagnosed with RA in 2008

### The 1987 ACR classification criteria for rheumatoid arthritis

4 out of 7 criteria with symptoms at least 6 weeks is needed for classification of a patient as having RA

|                                                                                                                 |  |
|-----------------------------------------------------------------------------------------------------------------|--|
| <b>1)</b> Morning stiffness- at least 1 hour                                                                    |  |
| <b>2)</b> Arthritis in at least 3 out of 14 joint areas (pip-, mcp-, wrist-, elbow-, knee-, ankle-, mtp-joints) |  |
| <b>3)</b> Arthritis of hand joints (mcp-, pip-, wrists)                                                         |  |
| <b>4)</b> Symmetric arthritis (mcp-, pip-, mtp-joints)                                                          |  |
| <b>5)</b> Rheumatoid nodules                                                                                    |  |
| <b>6)</b> Positive Serum Rheumatoid factor                                                                      |  |
| <b>7)</b> Radiographic changes (typical of rheumatoid arthritis on posteroanterior hand and wrist radiographs)  |  |
| <b>8)</b> Fullfills criteria                                                                                    |  |

[illegible]

### The 2010 ACR-EULAR classification criteria for rheumatoid arthritis

Patient with at least one joint with definitive clinical synovitis.  $\geq 6$  points is needed for classification of a patient as having definite RA

|                                                                                                        |  |
|--------------------------------------------------------------------------------------------------------|--|
| <b>A. Joint involvement-</b> Refers to any swollen or tender joint on examination                      |  |
| DIP, CMC 1 and MTP- 1 joints excluded from assessment                                                  |  |
| 1 large joint (shoulder, elbow, hip, knee, ankle)                                                      |  |
| 2-10 large joints                                                                                      |  |
| 1-3 small joint (mcp, pip, mtp 2-5, wrist, ip-1)-with or without involvement of large joints           |  |
| 4-10 small joints- with or without involvement of large joints                                         |  |
| > 10 joints- at least one small joint(also including other joints ie. AC, SC)                          |  |
| <b>B. Serology</b> (at least 1 test result is needed for classification)                               |  |
| Negative RF <i>and</i> negative ACPA                                                                   |  |
| Low positive RF <i>or</i> low positive ACPA                                                            |  |
| High positive RF <i>or</i> high positive ACPA                                                          |  |
| <i>Low positive: IU values &gt; the ULN but &lt; 3 times the ULN .</i>                                 |  |
| <i>High positive: &gt; 3 times the ULN. If RF information only available as positiv=low positive</i>   |  |
| <b>C. Acute-phase reactants</b>                                                                        |  |
| Normal CRP <i>and</i> normal ESR                                                                       |  |
| Abnormal CRP <i>or</i> abnormal ESR                                                                    |  |
| <b>D. Duration of symptoms</b> (patient self-report of the duration of signs or symptoms of synovitis) |  |
| <6 weeks                                                                                               |  |
| >6 weeks                                                                                               |  |
| <b>E. Fulfills criteria</b>                                                                            |  |

| Points |  |  |
|--------|--|--|
| 0      |  |  |
| 1      |  |  |
| 2      |  |  |
| 3      |  |  |
| 5      |  |  |
| 0      |  |  |
| 2      |  |  |
| 3      |  |  |
| 0      |  |  |
| 1      |  |  |
| 0      |  |  |
| 1      |  |  |

Additional information

|                                                                                          |      |
|------------------------------------------------------------------------------------------|------|
| RA-diagnosis in the NPR (date when the RA-diagnosis was validated)                       | date |
| Included in the SRQ                                                                      | date |
| Clinical RA diagnosis (based on the medical journal in take care)                        | date |
| Date of onset of symptoms (based on the medical journal in take care and SRQ)            |      |
| Erosive disease 1 year after RA-diagnosis (based on hand and feet radiographs )          |      |
| Erosive disease 2 years after RA-diagnosis(based on hand and feet radiographs)           |      |
| Remaining RA diagnosis after 2 years (based on the medical record in take care)          |      |
| Other diagnosis if not RA/co-morbidity/comment(based on the medical record in Take Care) |      |

|  |  |  |
|--|--|--|
|  |  |  |
|  |  |  |
|  |  |  |
